# Supplementary material for: vamos: variable-number tandem repeats annotation using efficient motif sets
Source: PubMed Central journal article supplement (PMC10373352; doi:10.1186/s13059-023-03010-y), 2023-07-27
Supplement: 13059_2023_3010_MOESM1_ESM.pdf [file 13059_2023_3010_MOESM1_ESM.pdf]

**Theorem S1.** Let  $\Sigma^*$  denote the complete set of sequences that are concatenations of motifs from  $\Sigma$ . If an efficient motif set  $\tilde{\Sigma} \subseteq \Sigma$  exists, which minimizes the sum of  $\lambda \times \|\tilde{\Sigma}\|$  and total motifs replacement cost  $\sum_{i=1}^p o_i * \sum_{j=1}^p x_{ij} * \delta_{ij}$  and satisfies the three requirements below, then there exists  $\tilde{v}_j \in \tilde{\Sigma}^*$  such that  $\sum_j \text{div}(v_j, \tilde{v}_j) \leq \sum_{i=1}^p o_i * \sum_{j=1}^p x_{ij} * \delta_{ij} < \Delta, v_j \in V$ .

- All occurrence of  $m_i \in \Sigma$  is replaced by one and only one  $m_j \in \tilde{\Sigma}$  (possibly itself).
- Motif  $m_i$  cannot be replaced by motif  $m_j$  if  $o_i \geq o_j$ .
- The total motifs replacement cost  $\sum_{i=1}^p o_i * \sum_{j=1}^p x_{ij} * \delta_{ij} < \Delta$ .

*Proof.* Assume an efficient motif set  $\tilde{\Sigma} \subseteq \Sigma$  exists. Each VNTR sequence  $v_j$  can be represented as a sequence of original motifs  $m_j^1 \circ \dots \circ m_j^l$ , each  $m_j^i \subseteq \Sigma$ . By substituting each  $m_j^i$  with its counterpart efficient motif  $\tilde{m}_j^i$ , we get  $\tilde{v}_j = \tilde{m}_j^1 \circ \dots \circ \tilde{m}_j^l$ . For each  $v_j$  and  $\tilde{v}_j$ , it is clear that  $\text{div}(v_j, \tilde{v}_j) \leq \sum_i \text{div}(m_j^i, \tilde{m}_j^i)$ , otherwise the combination of edit operations from individual motif alignments would infer a more parsimonious edit distance for  $v_j$  and  $\tilde{v}_j$ . Therefore,  $\sum_{j=1}^p \text{div}(v_j, \tilde{v}_j) \leq \sum_i \text{div}(m_j^i, \tilde{m}_j^i) = \sum_{i=1}^p o_i * \sum_{j=1}^p x_{ij} * \delta_{ij} < \Delta$ .  $\square$
